# Supplementary material
Source: PubMed Central journal article supplement (PMC4040543)
Supplement: 1400586111_pnas.201400586SI.pdf [file 1400586111_pnas.201400586SI.pdf]

# Supporting Information

Stacy et al. 10.1073/pnas.1400586111

## SI Materials and Methods

**Strains and Media.** *Aggregatibacter actinomycetemcomitans* (*Aa*) and *Streptococcus gordonii* were cultured in filter-sterilized tryptic soy broth + 0.5% (wt/vol) yeast extract (TSBYE) medium. *Escherichia coli* was cultured in LB medium. Cultures were grown at 37 °C with shaking at 250 rpm oxicly in a 5% CO<sub>2</sub> atmosphere, microoxically in a chamber (Coy) with a 5% O<sub>2</sub>, 10% CO<sub>2</sub>, and 85% N<sub>2</sub> atmosphere, or anoxically in a chamber (Coy) with a 5% H<sub>2</sub>, 10% CO<sub>2</sub>, and 85% N<sub>2</sub> atmosphere. Where appropriate, antibiotics were used at previously described selection and maintenance concentrations (1). Agar plates containing bovine liver catalase (Sigma-Aldrich) were made by equilibrating concentrated agar media to 42 °C and adding lyophilized catalase (suspended in 50 mM potassium phosphate buffer, pH 7.0) to give a final catalase activity concentration of 10,000 U mL<sup>-1</sup>. *Aa* biofilms for monoculture experiments were formed by spotting 100 μL dense cell suspensions (OD = 0.5) onto 0.2-μm-pore-size polycarbonate filters (Whatman) placed onto the surface of tryptic soy agar + yeast extract (TSAYE) plates. Colony biofilms were moved to a fresh location on the plate after 24 h and further incubated anoxically for a total of 48 h before conducting experiments.

**Strain Construction.** The promoter fragment for generating a gene encoding the enzyme Dispersin B (*dspB*) transcriptional reporter construct (pYGK-pepB-β) was amplified from *Aa* 624 genomic DNA, digested, and ligated into pYGK-βGal (primers and restriction enzymes are listed in Table S4). The construct was electroporated into *Aa* 624 as previously described (2). Constructs for deleting the gene encoding the enzyme Dispersin B and *oxyR* from *Aa* 624 by natural transformation and homologous recombination were generated by using overlap extension PCR to fuse the 5'- and 3'-flanking regions of the target gene to an Spc<sup>R</sup> cassette (*aad9*). One hundred nanograms each fragment was mixed and amplified using the following conditions: (i) 5 min at 94 °C; (ii) 3 cycles of 45 s at 94 °C, 45 s at 40 °C, and 3 min at 68 °C; (iii) 10 cycles of 45 s at 94 °C, 45 s at 45 °C, and 3 min at 68 °C; (iv) 15 cycles of 45 s at 94 °C, 45 s at 50 °C, and 3 min at 68 °C; (v) 10 cycles of 45 s at 94 °C, 45 s at 55 °C, and 3 min at 68 °C; and (vi) 10 min at 68 °C. Natural transformation of 624 was performed as previously described (3). Briefly, a 5- to 10-mL culture of 624 was pelleted, declassified by pestling, and spotted onto TSAYE + 5% heat-inactivated horse serum (Life Technologies). Spots were incubated for 24 h, collected, and resuspended in TSBYE. cAMP (Sigma-Aldrich) was added to a final concentration of 2 mM, and the suspension was resuspended onto a fresh TSAYE + serum plate and incubated anoxically for 2 h to increase intracellular cAMP concentrations (4). The spot was then overlaid with 1 μg appropriate gene deletion construct and further incubated for 24 h before being resuspended and plated onto TSAYE with spectinomycin. Transformants were confirmed by PCR for replacement of the target gene with *aad9*. The *lysT* (5) promoter fragment for generating the constitutive mCherry construct

(pPJ002) was amplified from *Aa* Y4 genomic DNA and fused by overlap extension PCR to mCherry amplified from pmCherry (Clontech). The fusion was digested and ligated into pJAK16 (primers and restriction enzymes are listed in Table S4). The construct was electroporated into *Aa* 624 as previously described (2).

**β-Gal Assays.** Biofilms were transferred to test tubes with rich media [tryptic soy broth + yeast extract (TSBYE)] and vortexed to remove attached cells. β-Gal activity was quantified using a luminescence assay (Galacto-Light Plus; Life Technologies) and microplate luminometer (Luminoskan Ascent; Thermo-Fisher Scientific). Raw luminescence values were normalized by total protein concentration determined using a standard Bradford assay on cells washed and boiled in 6 M urea.

**Test Tube Dispersal Assay.** *Aa* 624 was inoculated to an OD of 0.01 into test tubes with 2 mL rich media (TSBYE) and incubated anoxically with shaking for 24 h to form ring biofilms. Biofilms were gently washed, replaced with 4 mL media, and further incubated, either anoxically or oxicly, with shaking for 48 h before being stained with crystal violet for visualization.

**Microscopy.** Abscess samples were resected from mice at the specified time point and immediately placed in coverwell imaging chambers (Electron Microscopy Sciences). For each chamber, ~50–100 μL Prolong Gold antifade reagent (Invitrogen) was placed on the sample, sealed with a 45 × 50-mm coverglass (12–544-F; Fisher-brand), and then analyzed by confocal laser-scanning microscopy. All samples were visualized using an A1 confocal (Nikon) on a Ti-E inverted microscope (Nikon) equipped with a Plan Apo 10×/0.45 N.A. differential interference contrast (DIC) N1 objective (Nikon). Images were acquired using an N-STORM super resolution camera (Nikon) controlled with NIS-Elements Ar 4.13 software (Nikon). For each sample, multiple Z stacks were taken from distinct areas within the abscess, and optical sections within each Z stack were collected using a step size of 4.0–10.0 μm. All instrument settings were uniformly consistent and maintained between each set of experimental conditions. Z-stack images were then adjusted for γ, brightness, and contrast (identically for compared image sets) using NIS-Elements Ar 4.0 software (Nikon) before spatial distribution analysis. Images were generated in the Image Analysis Core Facility supported by Texas Tech University Health Sciences Center.

**Operon Analysis.** RNA from *Aa* VT1169 and 624 oxic liquid cultures was isolated for RT-PCR. cDNA synthesis with N<sub>6</sub> random primers and PCR on genomic DNA, cDNA, and RNA templates was performed as previously described (6) using primers targeting cotranscribed coding regions (Table S4).

**RNA-seq.** RNA isolation, next-generation sequencing library preparation, and computational methods were conducted as previously described (7).

1. Brown SA, Whiteley M (2007) A novel exclusion mechanism for carbon resource partitioning in *Aggregatibacter actinomycetemcomitans*. *J Bacteriol* 189(17):6407–6414.
2. Sreenivasan PK, LeBlanc DJ, Lee LN, Fives-Taylor P (1991) Transformation of *Actinobacillus actinomycetemcomitans* by electroporation, utilizing constructed shuttle plasmids. *Infect Immun* 59(12):4621–4627.
3. Wang Y, Goodman SD, Redfield RJ, Chen C (2002) Natural transformation and DNA uptake signal sequences in *Actinobacillus actinomycetemcomitans*. *J Bacteriol* 184(13):3442–3449.
4. Gwinn ML, Yi D, Smith HO, Tomb JF (1996) Role of the two-component signal transduction and the phosphoenolpyruvate: Carbohydrate phosphotransferase systems in competence development of *Haemophilus influenzae* Rd. *J Bacteriol* 178(21):6366–6368.

5. Jorth P, Whiteley M (2010) Characterization of a novel riboswitch-regulated lysine transporter in *Aggregatibacter actinomycetemcomitans*. *J Bacteriol* 192(23):6240–6250.
6. Korgaonkar AK, Whiteley M (2011) *Pseudomonas aeruginosa* enhances production of an antimicrobial in response to N-acetylglucosamine and peptidoglycan. *J Bacteriol* 193(4):909–917.
7. Jorth P, Trivedi U, Rumbaugh K, Whiteley M (2013) Probing bacterial metabolism during infection using high-resolution transcriptomics. *J Bacteriol* 195(22):4991–4998.

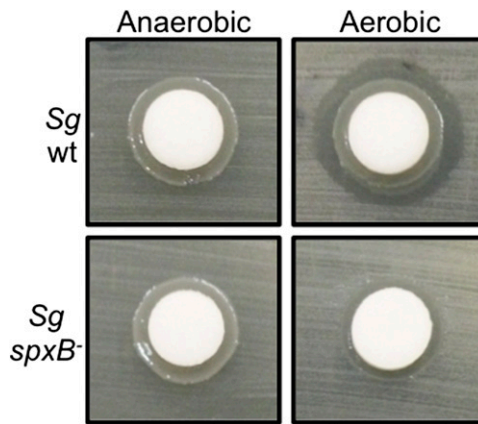

**Fig. S1.** Growth of *Aa* is inhibited by *S. gordonii* (*Sg*) in an  $H_2O_2$ -dependent manner. An overnight anoxic culture of *Aa* 624 was struck out as lawns onto rich media. Paper discs were placed onto the lawns and inoculated with  $10^7$  cfu exponential-phase *Sg* WT or *spxB*<sup>-</sup>, a mutant that does not produce  $H_2O_2$ . Images were acquired after coculturing the bacteria overnight under anoxic or oxic growth conditions. Images are of one representative experiment.

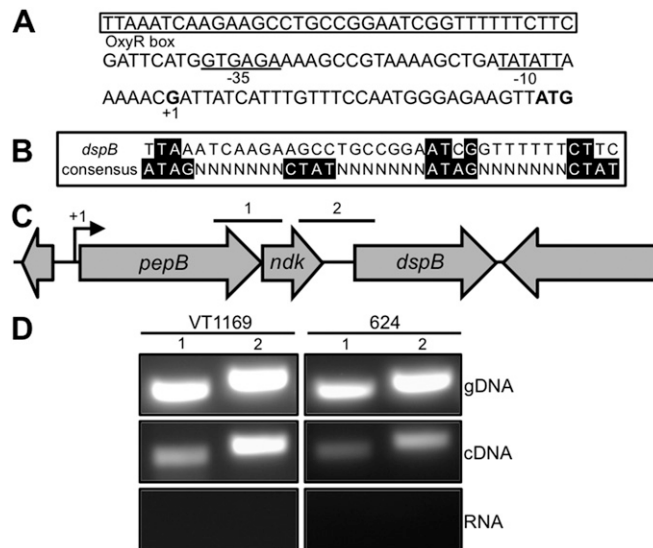

**Fig. S2.** The *dspB* promoter region and operon. (A) DNA sequence of the *dspB* promoter region. The start codon is in bold, the transcriptional start site is denoted by +1, putative  $\sigma^{70}$  promoter elements are underlined, and a putative OxyR operator is boxed. (B) Alignment to the consensus sequence shows that *dspB* has a degenerate OxyR binding sequence. (C) Structure of the *dspB* operon. Regions 1 and 2 correspond to the fragments amplified for the cotranscription analysis in D. (D) RT-PCR was used to show that *dspB* is in an operon with *pepB* and *ndk*. RNA for cDNA synthesis was extracted from oxic cultures of *Aa* strains VT1169 and 624. gDNA, genomic DNA.







**Table S1. Aa genes induced twofold or greater in the presence of oxygen**

| FC*  | SD   | ORF no. <sup>†</sup> | Description                                                                     |
|------|------|----------------------|---------------------------------------------------------------------------------|
| 2.00 | 1.33 | AA0004               | Conserved hypothetical protein                                                  |
| 2.42 | 2.49 | AA0019               | Hypothetical protein                                                            |
| 2.93 | 2.20 | AA0024               | DNA-binding protein, putative                                                   |
| 2.59 | 1.88 | AA0026               | Hypothetical protein                                                            |
| 4.68 | 4.63 | AA0065               | Hypothetical protein                                                            |
| 3.36 | 1.24 | AA0142               | Glycerate kinase, putative                                                      |
| 5.10 | 1.32 | AA0143               | Conserved hypothetical protein                                                  |
| 3.86 | 1.18 | AA0223               | Catalase ( <i>katA</i> )                                                        |
| 2.38 | 1.53 | AA0395               | Conserved hypothetical protein                                                  |
| 2.46 | 2.01 | AA0396               | Conserved hypothetical protein                                                  |
| 3.54 | 1.07 | AA0546               | Cytochrome c-type protein, putative                                             |
| 3.03 | 1.06 | AA0547               | Diheme cytochrome C napB precursor, putative                                    |
| 3.73 | 1.06 | AA0549               | Ferredoxin-type protein, putative                                               |
| 4.00 | 1.08 | AA0550               | Ferredoxin-type protein, putative                                               |
| 4.36 | 1.13 | AA0551               | Hypothetical protein                                                            |
| 3.67 | 1.04 | AA0551               | Hypothetical protein                                                            |
| 3.36 | 1.09 | AA0552               | Periplasmic nitrate reductase precursor, putative                               |
| 5.46 | 1.55 | AA0553               | NapD protein, putative                                                          |
| 2.00 | 2.72 | AA0631               | Hypothetical protein                                                            |
| 2.69 | 2.25 | AA0633               | Hypothetical protein                                                            |
| 2.22 | 1.13 | AA0708               | Cysteine desulfurase, putative                                                  |
| 2.22 | 1.09 | AA0709               | Conserved hypothetical protein                                                  |
| 2.22 | 1.16 | AA0715               | Ferredoxin 2Fe-2S, putative                                                     |
| 2.73 | 1.04 | AA0716               | Conserved hypothetical protein                                                  |
| 2.98 | 1.33 | AA0719               | Hypothetical protein                                                            |
| 2.83 | 1.30 | AA0719               | Hypothetical protein                                                            |
| 3.42 | 1.32 | AA0721               | Conserved hypothetical protein ( <i>dspB</i> )                                  |
| 3.25 | 1.19 | AA0722               | Nucleoside diphosphate kinase, putative                                         |
| 3.14 | 1.18 | AA0723               | Cytosol aminopeptidase, putative                                                |
| 3.31 | 1.30 | AA0795               | Iron compound ABC transporter, substrate-binding protein, putative              |
| 2.88 | 1.26 | AA0796               | Iron compound ABC transporter, permease protein, putative                       |
| 2.83 | 1.19 | AA0798               | Iron compound ABC transporter, permease protein, putative                       |
| 2.59 | 1.23 | AA0799               | Vibriobactin and enterobactin ABC transporter,<br>ATP-binding protein, putative |
| 2.11 | 4.33 | AA0803               | Hypothetical protein                                                            |
| 2.11 | 1.37 | AA1048               | Major ferric iron-binding protein, putative                                     |
| 2.93 | 4.77 | AA1212               | Hypothetical protein                                                            |
| 2.59 | 2.47 | AA1395               | Conserved hypothetical protein                                                  |
| 2.07 | 2.24 | AA1531               | Hypothetical protein                                                            |
| 2.51 | 1.36 | AA1604               | Conserved hypothetical protein                                                  |
| 2.38 | 2.86 | AA1620               | Hypothetical protein                                                            |
| 2.34 | 1.59 | AA1640               | Conserved hypothetical protein                                                  |
| 2.59 | 1.80 | AA1823               | Hypothetical protein                                                            |
| 2.73 | 1.38 | AA1824               | Not yet annotated                                                               |
| 2.55 | 1.28 | AA1825               | Iron(III) ABC transporter, permease protein, putative                           |
| 2.78 | 1.30 | AA1826               | Iron(III) ABC transporter, putative                                             |
| 2.88 | 1.47 | AA1827               | Iron(III) ABC transporter, periplasmic-binding protein, putative                |
| 2.98 | 1.46 | AA1840               | Conserved hypothetical protein                                                  |
| 2.42 | 2.50 | AA1904               | Hypothetical protein                                                            |
| 2.00 | 2.15 | AA1908               | Conserved hypothetical protein                                                  |
| 2.98 | 2.03 | AA1911               | Hypothetical protein                                                            |
| 3.03 | 1.06 | AA1984               | Tellurite resistance protein, putative                                          |
| 2.88 | 1.54 | AA2034               | Ferredoxin-NADP reductase, putative                                             |
| 2.42 | 2.92 | AA2074               | Hypothetical protein                                                            |
| 2.42 | 1.27 | AA2123               | Hypothetical protein                                                            |
| 2.14 | 1.46 | AA2436               | Conserved hypothetical protein                                                  |
| 5.37 | 1.50 | AA2485               | Adhesin invasin, putative ( <i>apiA</i> )                                       |
| 2.69 | 1.31 | AA2495               | Conserved hypothetical protein                                                  |
| 2.88 | 1.20 | AA2521               | Conserved hypothetical protein                                                  |
| 2.83 | 1.21 | AA2532               | Conserved hypothetical protein                                                  |
| 2.30 | 4.51 | AA2546               | Hypothetical protein                                                            |



**Table S1. Cont.**

| FC*  | SD   | ORF no. <sup>†</sup> | Description                    |
|------|------|----------------------|--------------------------------|
| 4.44 | 2.06 | AA2593               | Conserved hypothetical protein |
| 2.11 | 5.96 | AA2798               | Hypothetical protein           |
| 3.54 | 1.95 | AA2865               | Not yet annotated              |
| 2.00 | 1.84 | AA2921               | Conserved hypothetical protein |
| 2.18 | 4.12 | AA3016               | Hypothetical protein           |

\*Fold changes (FCs) are relative to anoxic gene expression and represent the average of four pairwise comparisons.

<sup>†</sup>ORF numbers are from the *Aa* HK1651 genome annotations ([www.genome.ou.edu/act.html](http://www.genome.ou.edu/act.html)).

**Table S2. Aa genes induced twofold or greater in the absence of oxygen**

| FC*   | SD   | ORF no.† | Description                                                                    |
|-------|------|----------|--------------------------------------------------------------------------------|
| 4.52  | 2.47 | AA0025   | Hypothetical protein                                                           |
| 4.92  | 1.77 | AA0031   | Hypothetical protein                                                           |
| 2.46  | 1.26 | AA0041   | Formate-dependent nitrite reductase, putative                                  |
| 6.50  | 1.20 | AA0043   | Polysulfide reductase, putative                                                |
| 5.56  | 1.14 | AA0044   | Nitrite reductase, iron-sulfur protein, putative                               |
| 7.73  | 1.09 | AA0046   | Nitrite reductase, cytochrome c-type protein, putative                         |
| 8.72  | 1.30 | AA0047   | Cytochrome c nitrite reductase, catalytic subunit NrfA, putative               |
| 3.73  | 1.13 | AA0069   | Conserved hypothetical protein                                                 |
| 2.64  | 1.33 | AA0236   | Anaerobic ribonucleoside-triphosphate reductase, putative                      |
| 2.59  | 1.35 | AA0288   | Conserved hypothetical protein                                                 |
| 2.14  | 1.46 | AA0290   | Conserved hypothetical protein                                                 |
| 2.00  | 1.41 | AA0478   | Phosphotransferase system, mannose-specific IIB component, putative            |
| 2.00  | 1.44 | AA0495   | Hypothetical protein                                                           |
| 5.01  | 1.23 | AA0804   | Fumarate reductase flavoprotein subunit, putative                              |
| 4.59  | 1.20 | AA0805   | Fumarate reductase iron-sulfur protein, putative                               |
| 5.66  | 1.06 | AA0806   | Fumarate reductase 15 kDa hydrophobic protein, putative                        |
| 6.84  | 1.17 | AA0807   | Fumarate reductase 13 kDa hydrophobic protein, putative                        |
| 2.78  | 2.80 | AA0852   | Hypothetical protein                                                           |
| 3.67  | 1.36 | AA0853   | Hypothetical protein                                                           |
| 2.59  | 1.26 | AA0854   | ABC transporter, permease protein, putative                                    |
| 2.26  | 1.22 | AA0855   | ABC transporter, permease protein, putative                                    |
| 2.14  | 1.26 | AA0856   | ABC transporter, periplasmic arginine-binding protein precursor, putative      |
| 2.26  | 1.33 | AA0858   | ABC transporter, ATP-binding protein, putative                                 |
| 3.61  | 1.31 | AA1137   | Anaerobic dimethyl sulfoxide reductase chain a, putative                       |
| 3.61  | 1.41 | AA1138   | Anaerobic dimethyl sulfoxide reductase chain B, putative                       |
| 3.14  | 1.36 | AA1140   | Anaerobic dimethyl sulfoxide reductase chain c, putative                       |
| 2.46  | 1.39 | AA1141   | Conserved hypothetical protein                                                 |
| 2.00  | 1.35 | AA1318   | Hypothetical protein                                                           |
| 2.46  | 1.82 | AA1379   | Glycerophosphoryl diester phosphodiesterase, putative                          |
| 2.42  | 1.49 | AA1383   | DprA protein, putative                                                         |
| 2.34  | 1.68 | AA1692   | Hexulose-6-phosphate synthase, putative                                        |
| 2.93  | 1.74 | AA1694   | Not yet annotated                                                              |
| 2.51  | 1.79 | AA1695   | Conserved hypothetical protein                                                 |
| 2.30  | 1.12 | AA1717   | Fumarate hydratase class II, putative                                          |
| 2.22  | 1.24 | AA1758   | Hydrogenase isoenzymes nickel incorporation protein hypB, putative             |
| 2.51  | 1.04 | AA1759   | Not yet annotated                                                              |
| 2.73  | 1.23 | AA1760   | Hydrogenase expression formation protein, putative                             |
| 2.07  | 1.13 | AA1767   | Hypothetical protein                                                           |
| 2.00  | 1.10 | AA1769   | Hypothetical protein                                                           |
| 5.10  | 1.60 | AA1839   | Bacteriophage transcriptional regulator, putative                              |
| 2.78  | 2.93 | AA1950   | Spermidine putrescine ABC transporter, permease protein, putative              |
| 3.73  | 1.69 | AA2028   | Conserved hypothetical protein                                                 |
| 3.54  | 2.30 | AA2149   | Conserved hypothetical protein                                                 |
| 2.34  | 1.72 | AA2190   | Hydrogenase assembly chaperone HypC, putative                                  |
| 5.46  | 1.28 | AA2193   | Oxaloacetate decarboxylase $\gamma$ -subunit, putative                         |
| 5.37  | 1.41 | AA2195   | Oxaloacetate decarboxylase $\alpha$ -subunit, putative                         |
| 5.56  | 1.72 | AA2196   | Oxaloacetate decarboxylase $\beta$ -subunit, putative                          |
| 3.61  | 2.53 | AA2199   | Hypothetical protein                                                           |
| 2.42  | 1.17 | AA2231   | Dethiobiotin synthetase, putative                                              |
| 15.45 | 1.22 | AA2250   | Cytochrome c-type protein, putative                                            |
| 12.13 | 1.06 | AA2251   | Biotin sulfoxide reductase, putative                                           |
| 2.73  | 1.45 | AA2540   | 5-Methyltetrahydropteroyltriglutamate-homocysteine methyltransferase, putative |
| 2.30  | 1.33 | AA2565   | Transketolase, N-terminal subunit, putative                                    |
| 2.11  | 1.30 | AA2566   | Conserved hypothetical protein                                                 |
| 2.18  | 1.42 | AA2567   | Hypothetical protein                                                           |
| 3.19  | 1.43 | AA2595   | Cytochrome c551 peroxidase, putative                                           |
| 2.38  | 1.39 | AA2682   | Not yet annotated                                                              |
| 9.35  | 1.23 | AA2683   | Conserved hypothetical protein                                                 |
| 5.56  | 1.53 | AA2684   | Conserved hypothetical protein                                                 |
| 4.52  | 1.46 | AA2686   | Hypothetical protein                                                           |
| 13.00 | 3.19 | AA2687   | Na <sup>+</sup> H <sup>+</sup> antiporter component, putative                  |
| 6.96  | 1.16 | AA2688   | Not yet annotated                                                              |



Table S2. Cont.

| FC*  | SD   | ORF no. <sup>†</sup> | Description                                          |
|------|------|----------------------|------------------------------------------------------|
| 7.09 | 1.45 | AA2689               | Hypothetical protein                                 |
| 7.34 | 1.25 | AA2691               | Hypothetical protein                                 |
| 5.66 | 1.26 | AA2692               | Hydrogenase, putative                                |
| 6.06 | 1.29 | AA2693               | Not yet annotated                                    |
| 5.01 | 1.38 | AA2695               | Not yet annotated                                    |
| 4.07 | 1.46 | AA2696               | Not yet annotated                                    |
| 3.19 | 1.37 | AA2697               | Not yet annotated                                    |
| 5.96 | 1.31 | AA2698               | Formate dehydrogenase, $\alpha$ -subunit, putative   |
| 5.86 | 1.13 | AA2699               | Formate dehydrogenase, $\alpha$ -subunit             |
| 2.59 | 2.58 | AA2705               | Hypothetical protein                                 |
| 2.42 | 1.26 | AA2706               | 2-Oxoglutarate dehydrogenase, E1 component, putative |
| 5.96 | 1.13 | AA2716               | Not yet annotated                                    |
| 2.07 | 1.26 | AA2726               | Not yet annotated                                    |
| 8.57 | 1.38 | AA2784               | Not yet annotated                                    |
| 2.51 | 1.26 | AA2805               | Leukotoxin secretion ATP-binding protein             |
| 2.11 | 1.35 | AA2807               | Leukotoxin-activating lysine-acyltransferase         |
| 2.51 | 1.67 | AA2808               | Hypothetical protein                                 |
| 2.69 | 1.61 | AA2876               | Hypothetical protein                                 |
| 3.67 | 1.70 | AA2969               | $\beta$ -Eliminating lyase, putative                 |
| 2.59 | 1.73 | AA2970               | $\beta$ -Eliminating lyase, putative                 |
| 2.69 | 2.40 | AA2972               | $\beta$ -Eliminating lyase, putative                 |

\*Fold changes (FCs) are relative to anoxic gene expression and represent the average of four pairwise comparisons.

<sup>†</sup>ORF numbers are from the *Aa* HK1651 genome annotations ([www.genome.ou.edu/act.html](http://www.genome.ou.edu/act.html)).

Table S3. Strains and plasmids used in this study

| Strain or plasmid                | Description                                                                                           | Source     |
|----------------------------------|-------------------------------------------------------------------------------------------------------|------------|
| <b>Aa</b>                        |                                                                                                       |            |
| VT1169                           | WT, NaI <sup>R</sup> Rif <sup>R</sup>                                                                 | 1          |
| VT1169 <i>oxyR</i> <sup>-</sup>  | <i>oxyR</i> null mutant, Spc <sup>R</sup>                                                             | 2          |
| 624                              | WT                                                                                                    | 3          |
| 624 <i>oxyR</i> <sup>-</sup>     | <i>oxyR</i> deletion mutant, Spc <sup>R</sup>                                                         | This study |
| 624 <i>dspB</i> <sup>-</sup>     | <i>dspB</i> deletion mutant, Spc <sup>R</sup>                                                         | This study |
| <b>E. coli</b>                   |                                                                                                       |            |
| DH5 $\alpha$                     | endA1 hsdR17 supE44 thi-1 recA1 $\Delta$ (lacZYA-argF) U169, deoR [ $\Phi$ 80dlac $\Delta$ (lacZ)M15] | 4          |
| <b>Sg</b>                        |                                                                                                       |            |
| Challis DL1.1                    | WT                                                                                                    | ATCC 49818 |
| Challis <i>spxB</i> <sup>-</sup> | <i>spxB</i> null mutant, Spc <sup>R</sup>                                                             | 5          |
| Challis GFP                      | Constitutive GFP                                                                                      | This study |
| <b>Plasmids</b>                  |                                                                                                       |            |
| pYGK- $\beta$ Gal                | pYGK expression vector with promoterless <i>lacZ</i> , Kan <sup>R</sup>                               | 6          |
| pYGK-pepB- $\beta$               | pYGK- $\beta$ Gal with <i>pepB</i> promoter region, Kan <sup>R</sup>                                  | This study |
| pYGS-OxyRC                       | <i>oxyR</i> complementation vector                                                                    | 2          |
| pGEM-T Easy                      | TA cloning vector, Amp <sup>R</sup>                                                                   | Promega    |
| pVT1461                          | Source of <i>aad9</i>                                                                                 | 7          |
| pmCherry                         | Source of mCherry                                                                                     | Clontech   |
| pJAK16                           | Expression vector                                                                                     | 8          |
| pPJ002                           | <i>lysT</i> promoter-mCherry fusion                                                                   | This study |

- Mintz KP (2004) Identification of an extracellular matrix protein adhesin, EmaA, which mediates the adhesion of *Actinobacillus actinomycetemcomitans* to collagen. *Microbiol* 150(8): 2677–2688.
- Ramsey MM, Whiteley M (2009) Polymicrobial interactions stimulate resistance to host innate immunity through metabolite perception. *Proc Natl Acad Sci USA* 106(5):1578–1583.
- Jorth P, Whiteley M (2012) An evolutionary link between natural transformation and CRISPR adaptive immunity. *mBio* 3(5):e00309–12.
- Sambrook JFE, Maniatis T (1989) *Molecular Cloning: A Laboratory Manual* (Cold Spring Harbor Lab Press, Plainview, NY).
- Kreth J, Zhang Y, Herzberg MC (2008) Streptococcal antagonism in oral biofilms: *Streptococcus sanguinis* and *Streptococcus gordonii* interference with *Streptococcus mutans*. *J Bacteriol* 190(13):4632–4640.
- Brogan JM, Lally ET, Demuth DR (1996) Construction of pYGK, an *Actinobacillus actinomycetemcomitans*-*Escherichia coli* shuttle vector. *Gene* 169(1):141–142.
- Mintz KP, Brissette C, Fives-Taylor PM (2002) A recombinase A-deficient strain of *Actinobacillus actinomycetemcomitans* constructed by insertional mutagenesis using a mobilizable plasmid. *FEMS Microbiol Lett* 206(1):87–92.
- Kachlany SC, et al. (2000) Nonspecific adherence by *Actinobacillus actinomycetemcomitans* requires genes widespread in bacteria and archaea. *J Bacteriol* 182(21):6169–6176.

**Table S4. Primers used in this study**

| Function/name                            | Sequence (5' → 3')                                      | Underlined region*        |
|------------------------------------------|---------------------------------------------------------|---------------------------|
| <b>Operon RT-PCR</b>                     |                                                         |                           |
| Region 1                                 |                                                         |                           |
| Operon-1-F                               | ACTGCCACCGCTTTTTATCC                                    |                           |
| Operon-1-R                               | TTTGGCAGCGTTCTCAGGGTTAG                                 |                           |
| Region 2                                 |                                                         |                           |
| Operon-2-F                               | CACGATTGCGCGTGATTTTGC                                   |                           |
| Operon-2-R                               | CCGCACGTTGATTAAGTAAATGGC                                |                           |
| <i>dspB</i> transcriptional reporter     |                                                         |                           |
| <i>pepB</i> promoter                     |                                                         |                           |
| pepB-pro-F                               | <u>GGGGTACCCCACTGCCTTTATTGATGCGCAG</u>                  | KpnI                      |
| pepB-pro-R                               | <u>CGGGATCCCGAACTTCTCCATTGGAAACAATG</u>                 | BamHI                     |
| <i>oxyR</i> deletion construct           |                                                         |                           |
| 5'-Flanking region                       |                                                         |                           |
| oxyR-UP-F                                | <u>AAGTGCGGTACGCTTCTAAATCATCACTGC</u>                   | USS                       |
| oxyR-UP-R                                | <u>CATGTATTCACGAACGAAAAATCGAGATCCTCAATTATAGAAGGTAGC</u> | Overlaps with <i>aad9</i> |
| 3'-Flanking region                       |                                                         |                           |
| oxyR-DN-F                                | <u>GAAAACAATAAACCTTGCATATGTGGGGTAAGCTATGGTCCG</u>       | Overlaps with <i>aad9</i> |
| oxyR-DN-R                                | <u>AAGTGCGGTCCGAAATGGGGAACAACC</u>                      | USS                       |
| <i>dspB</i> deletion construct           |                                                         |                           |
| 5'-Flanking region                       |                                                         |                           |
| dspB-UP-F                                | <u>AAGTGCGGTATGGATGATAACTGGTCCGC</u>                    | USS                       |
| dspB-UP-R                                | <u>CATGTATTCACGAACGAAAAATCGTGTCCAGCATTAAATCCGGTCT</u>   | Overlaps with <i>aad9</i> |
| 3'-Flanking region                       |                                                         |                           |
| dspB-DN-F                                | <u>GAAAACAATAAACCTTGCATATGAAATAGATTGCTAACGCGTGTTC</u>   | Overlaps with <i>aad9</i> |
| dspB-DN-R                                | <u>AAGTGCGGTACGGCAATGTGATTCAAGGTT</u>                   | USS                       |
| Sp <sup>c</sup> cassette ( <i>aad9</i> ) |                                                         |                           |
| SpcR-F                                   | CGATTTTCGTTCTGGAATACATG                                 |                           |
| SpcR-R                                   | CATATGCAAGGGTTTATTGTTTTT                                |                           |
| Constitutive mCherry                     |                                                         |                           |
| <i>lysT</i> promoter                     |                                                         |                           |
| lysT-pro-F                               | <u>TGACGGATCCACTTGTGTAGAGGTGCAAAC</u>                   | BamHI                     |
| lysT-pro-R                               | CCTCCTCGCCCTTGCTCACCATTTGTTCTTCTAATATTAAGGGAGAAC        |                           |
| mCherry                                  |                                                         |                           |
| cherry-F                                 | CCCTTAATATTAGGAAGAACAATGGTGAGCAAGGGCG                   |                           |
| cherry-R                                 | <u>TGACAAGCTTCGCTACTTGACAGCTCGT</u>                     | HindIII                   |
| Semiquantitative RT-PCR                  |                                                         |                           |
| <i>dspB</i>                              |                                                         |                           |
| dspB-F                                   | TATTTTATCTTTTCTACTGGG                                   |                           |
| dspB-R                                   | CACTCATCCCCATTCGTC                                      |                           |
| <i>clpX</i>                              |                                                         |                           |
| clpX-F                                   | GCAGAAACCATGGCGGTATG                                    |                           |
| clpX-R                                   | CAATTCGCTTAATGGCGCCAC                                   |                           |

\*Represents the restriction site, overlap extension sequence, or uptake signal sequence (USS).

## Other Supporting Information Files

[Dataset S1 \(XLS\)](#)
